# Supplementary material
Source: MDPI journal article supplement (https://www.mdpi.com/2571-6131/6/1/4)
Supplement: s1 [file s1]

Archive with 2 entries (2 files):
- ceramics-2097978-supplementary.pdf
- honeycombs_File S1.stl
